# Supplementary material for: Assessments of therapeutic effects according to timings for combined therapy with axitinib and immune check point inhibitor in a mouse renal cell carcinoma model
Source: PubMed Central journal article supplement (PMC10344912; doi:10.1038/s41598-023-37857-9), 2023-07-13

Supplementary Figure 2 :Proportion of cells expressing PD-L1 / PD-L2 *in vivo*

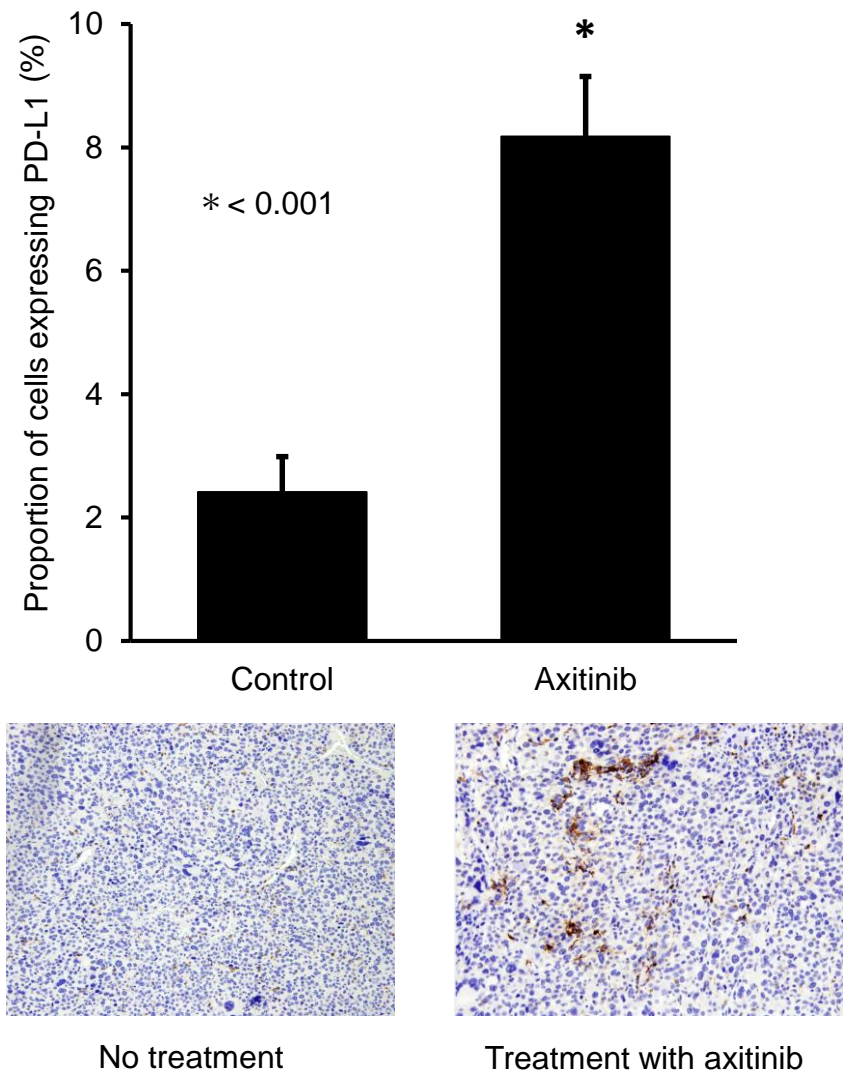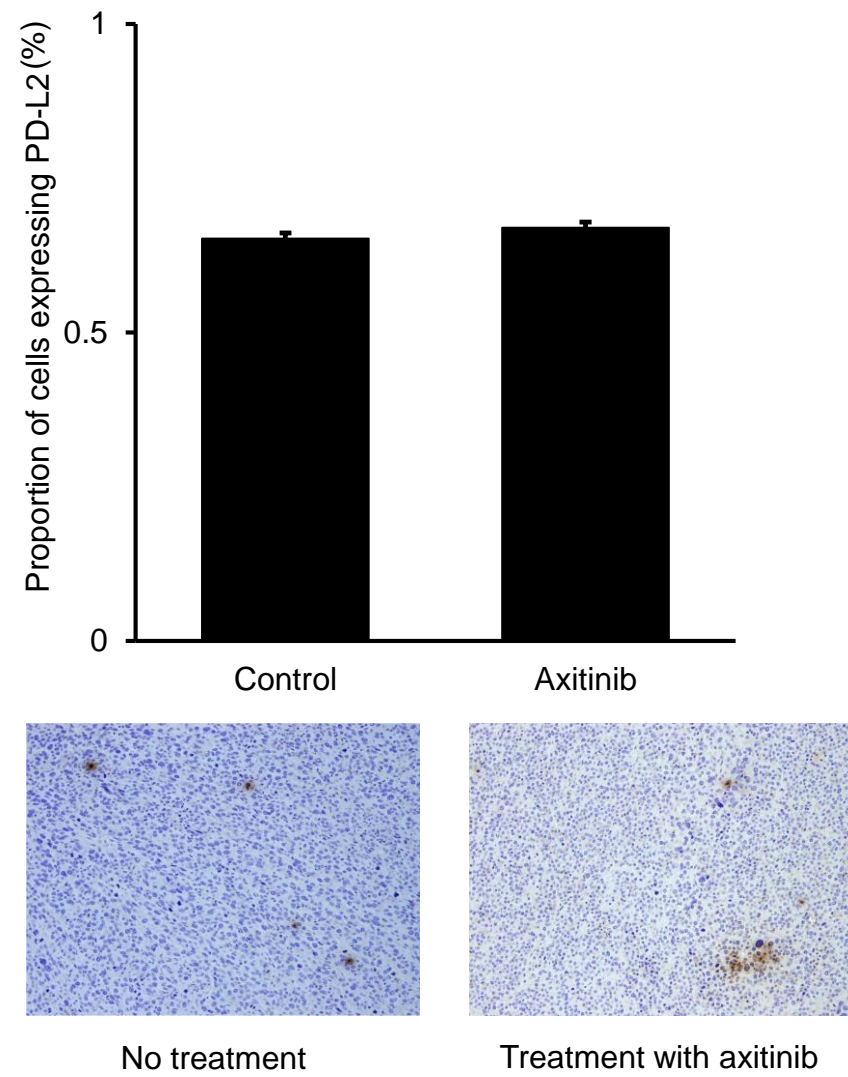

Supplement: 41598_2023_37857_MOESM2_ESM.pdf [file 41598_2023_37857_MOESM2_ESM.pdf]
